# Supplementary material
Source: Research Square preprint supplement (doi:10.21203/rs.3.rs-8849122/v1)
Supplement: Supplementary file 1 [file 314c88cdf4c583a84a011c0e.docx]

|  | I-sCRT Group  (n=115) | sCRT Group  （n=201） |
| --- | --- | --- |
| **Sex** |  |  |
| Male | 102 (88.7%) | 178 (88.6%) |
| Female | 13（11.3%） | 23 (11.4%) |
| **Age, Years** |  |  |
| Median | 64（42-77） | 65（34-80） |
| < 65 | 60（52.2%） | 96 （47.8） |
| ≥65 | 55 (47.8%) | 105（52.2%） |
| **Smoking history** |  |  |
| Never smoked | 18（15.7%） | 32（15.9%） |
| Former or current smoker | 97 （84.3%） | 169（84.1%） |
| **Eastern Cooperative Oncology Group performance status** |  |  |
| 0 | 17（14.8%） | 30（14.9%） |
| 1 | 98（85.2%） | 171（85.1%） |
| **Disease stage** |  |  |
| IIIA | 32（27.8%） | 72（35.8%） |
| IIIB | 55（47.8%） | 102（50.7%） |
| IIIC | 28（24.4%） | 27（13.5%） |
| **Tumour histological type** |  |  |
| Squamous cell carcinoma | 68（59.1%） | 118（58.7%） |
| Adenocarcinoma | 26（22.6%） | 43（21.4%） |
| NOS | 19（16.5%） | 24（11.9%） |
| Other | 2（1.8%） | 16（8.0%） |
| **PD-L1 expression** |  |  |
| <1% | 58（50.4%） | 79（39.3） |
| ≥1% | 21（18.3%） | 32（15.9%） |
| Missing | 36（31.3%） | 90（44.8%） |
| **Previous platinum treatment** |  |  |
| Carboplatin | 85（73.9） | 105（52.2） |
| Cisplatin | 23（20.0） | 77（38.3） |
| Nedaplatin | 7（6.1） | 19（9.5） |
| **Cycles of first line chemotherapy** |  |  |
| 2 | 17 (14.8) | 31 (15.5) |
| 3 | 35 (30.4) | 58 (28.8) |
| 4 | 48 (41.7) | 87 (43.3) |
| 5 | 13 (11.4) | 19 (9.4) |
| 6 | 2 (1.7) | 6 (3.0) |
| **Radiotherapy dose** |  |  |
| <60 Gy | 22（19.1%） | 45（22.4%） |
| ≥60 Gy | 93（80.9%） | 156（77.6%） |
| **Best response to chemoradiotherapy** |  |  |
| CR | 2（1.7%） | 0（0） |
| PR | 88（76.5%） | 100（49.8%） |
| SD | 25（21.7%） | 101（50.2%） |
