# Supplementary material
Source: Research Square preprint supplement (doi:10.21203/rs.3.rs-8849122/v1)
Supplement: Supplementary file 2 [file d5f75e401577bc7ae244a5c2.docx]

|  | **Grade 1–2** | | | | | **Grade 3–4** | | | | | **Grade 5** | | | | |
| --- | --- | --- | --- | --- | --- | --- | --- | --- | --- | --- | --- | --- | --- | --- | --- |
| **Toxicity** | **I-sCRT** | | **sCRT** | | **p‐Value** | **I-sCRT** | | **sCRT** | | **p‐Value** | **I-sCRT** | | **sCRT** | | **p‐Value** |
| **n=** | **115** | **n=** | **201** | **n=** | **115** | **n=** | **201** | **n=** | **115** | **n=** | **201** |
| Number of patients with at least one treatment-related adverse event | 77 | 67.0% | 124 | 61.7% | 0.349 | 19 | 16.5% | 31 | 15.4% | 0.797 | 1 | 0.9% | 0 | 0.0% | 0.185 |
| Pneumonitis | 35 | 30.4% | 57 | 28.4% | 0.696 | 6 | 5.2% | 8 | 4.0% | 0.607 | 1 | 0.9% | 0 | 0.0% | 0.185 |
| Radiation esophagitis | 47 | 40.9% | 88 | 43.8% | 0.615 | 0 | 0.0% | 1 | 0.5% | 0.449 | 0 | 0.0% | 0 | 0.0% | 1.000 |
| Hypothyroidism | 16 | 13.9% | 8 | 4.0% | **0.001** | 2 | 1.7% | 0 | 0.0% | 0.061 | 0 | 0.0% | 0 | 0.0% | 1.000 |
| Hyperthyroidism | 13 | 11.3% | 9 | 4.5% | **0.022** | 1 | 0.9% | 0 | 0.0% | 0.185 | 0 | 0.0% | 0 | 0.0% | 1.000 |
| Gastrointestinal reaction | 43 | 37.4% | 63 | 31.3% | 0.273 | 2 | 1.7% | 1 | 0.5% | 0.273 | 0 | 0.0% | 0 | 0.0% | 1.000 |
| Fatigue | 52 | 45.2% | 82 | 40.8% | 0.444 | 1 | 0.9% | 0 | 0.0% | 0.185 | 0 | 0.0% | 0 | 0.0% | 1.000 |
| Anemia | 10 | 8.7% | 15 | 7.5% | 0.696 | 5 | 4.3% | 3 | 1.5% | 0.120 | 0 | 0.0% | 0 | 0.0% | 1.000 |
| Leukopenia | 50 | 43.5% | 85 | 42.3% | 0.837 | 12 | 10.4% | 16 | 8.0% | 0.456 | 0 | 0.0% | 0 | 0.0% | 1.000 |
| Decreased platelet count | 28 | 24.3% | 40 | 19.9% | 0.355 | 10 | 8.7% | 14 | 7.0% | 0.576 | 0 | 0.0% | 0 | 0.0% | 1.000 |
| Liver dysfunction | 29 | 25.2% | 39 | 19.4% | 0.226 | 4 | 3.5% | 4 | 2.0% | 0.418 | 0 | 0.0% | 0 | 0.0% | 1.000 |
| Renal dysfunction | 15 | 13.0% | 21 | 10.4% | 0.485 | 1 | 0.9% | 2 | 1.0% | 0.912 | 0 | 0.0% | 0 | 0.0% | 1.000 |
| Hyperlipidemia | 9 | 7.8% | 5 | 2.5% | **0.026** | 0 | 0.0% | 0 | 0.0% | 1.000 | 0 | 0.0% | 0 | 0.0% | 1.000 |
